# Supplementary material
Source: Research Square preprint supplement (doi:10.21203/rs.3.rs-9074591/v1)
Supplement: Supplementary file 1 [file 45a4b77f19931162d53f6097.docx]

**Supplemental Material**

All analyses reported in this manuscript are fully reproducible using these materials. Supplementary materials include:

1. Table S1. Full-scale items with response anchors and source references.
2. Table S2. Descriptive statistics and item-total correlations.
3. Table S3. Discriminant validity: Fornell–Larcker criterion.
4. Table S4. Discriminant validity: Heterotrait–monotrait (HTMT) ratios.
5. Table S5. Comprehensive node centrality indices: bridge strength, bridge betweenness, bridge closeness, and bridge expected influence.
6. Table S6. Sensitivity analysis results across EBICglasso tuning parameters γ = 0.25, 0.50, and 0.75.

| Dimension | Item Code | English Wording | Chinese Wording |
| --- | --- | --- | --- |
| Psychosocial Competence (PSC) | PSC1 | Actively cultivate hobbies and interests | 积极培养自己的兴趣爱好 |
| PSC2 | Value life and health | 珍视生命与健康 |
| PSC3 | Actions positively influence others | 自己的行为能对他人产生积极影响 |
| PSC4 | Effectively communicate across cultures | 能够进行有效的跨文化沟通 |
| PSC5 | Seek support when stressed | 在压力大时主动寻求支持 |
| PSC6 | Encourage self after setbacks | 遭遇挫折后能够自我鼓励 |
| Health-Promoting Behavior (HPB) | HPB1 | Maintain regular, balanced meals | 保持规律、均衡的膳食 |
| HPB2 | Understand functions of nutrients | 了解各类营养素的生理功能 |
| HPB3 | Ensure adequate sleep | 保证充足的睡眠时间 |
| HPB4 | Control screen time | 控制电子屏幕使用时间 |
| HPB5 | Persist in physical exercise | 坚持体育锻炼 |
| Health Information Literacy (HIL) | HIL1 | Obtain information via multiple channels | 能够通过多种渠道获取健康信息 |
| HIL2 | Evaluate information reliability | 能够评估健康信息的可靠性 |
| HIL3 | Convey health information clearly | 能够清晰地向他人传达健康信息 |
| HIL4 | Make decisions based on information | 能够基于获取的信息做出健康决策 |
| HIL5 | Actively follow medical advice | 能够主动遵从医嘱 |
| HIL6 | Read drug instructions correctly | 能够正确阅读和理解药品说明书 |
| Self-Care Skills (SCA) | SCA1 | Interpret fitness test data | 能够解读体测数据（如心率、肺活量等） |
| SCA2 | Measure pulse correctly | 能够正确测量自己的脉搏 |
| SCA3 | Handle common injuries/emergencies | 能够处理常见损伤或紧急情况 |
| SCA4 | Recognize safety/distress signals | 能够识别自身的安全/危险信号 |
| SCA5 | Handle mild burns/cuts | 能够处理轻度烧烫伤或割伤 |
| SCA6 | Use emergency equipment correctly | 能够正确使用应急设备（如灭火器等） |

Table S1. Full-scale items with response anchors and source references.

| Item | Mean | SD | Skewness | Kurtosis | Item-Total r | α if deleted |
| --- | --- | --- | --- | --- | --- | --- |
| PSC1 | 2.23 | 0.66 | -0.13 | -0.50 | 0.80 | 0.940 |
| PSC2 | 2.09 | 0.67 | 0.14 | 0.15 | 0.81 | 0.938 |
| PSC3 | 2.26 | 0.67 | -0.09 | -0.42 | 0.82 | 0.937 |
| PSC4 | 2.28 | 0.69 | 0.07 | 0.05 | 0.82 | 0.938 |
| PSC5 | 2.19 | 0.66 | 0.19 | 0.67 | 0.89 | 0.930 |
| PSC6 | 2.23 | 0.66 | 0.05 | 0.15 | 0.87 | 0.932 |
| HPB1 | 2.39 | 0.72 | 0.14 | 0.51 | 0.81 | 0.900 |
| HPB2 | 2.35 | 0.69 | 0.09 | 0.11 | 0.81 | 0.900 |
| HPB3 | 2.39 | 0.70 | 0.06 | 0.32 | 0.81 | 0.900 |
| HPB4 | 2.35 | 0.71 | 0.01 | -0.03 | 0.80 | 0.901 |
| HPB5 | 2.44 | 0.75 | -0.01 | 0.08 | 0.76 | 0.910 |
| HIL1 | 2.18 | 0.67 | 0.20 | 0.36 | 0.85 | 0.941 |
| HIL2 | 2.23 | 0.66 | 0.09 | 0.20 | 0.86 | 0.940 |
| HIL3 | 2.21 | 0.65 | 0.09 | 0.22 | 0.87 | 0.939 |
| HIL4 | 2.25 | 0.67 | -0.03 | -0.05 | 0.86 | 0.940 |
| HIL5 | 2.17 | 0.66 | -0.03 | -0.39 | 0.83 | 0.943 |
| HIL6 | 2.13 | 0.66 | -0.04 | -0.46 | 0.82 | 0.944 |
| SCA1 | 2.23 | 0.66 | 0.10 | 0.22 | 0.85 | 0.937 |
| SCA2 | 2.29 | 0.69 | 0.23 | 0.52 | 0.83 | 0.939 |
| SCA3 | 2.38 | 0.74 | 0.15 | 0.20 | 0.84 | 0.938 |
| SCA4 | 2.21 | 0.64 | 0.07 | 0.23 | 0.84 | 0.938 |
| SCA5 | 2.34 | 0.70 | 0.16 | 0.15 | 0.86 | 0.935 |
| SCA6 | 2.28 | 0.68 | 0.22 | 0.59 | 0.82 | 0.939 |

Table S2. Descriptive statistics and item-total correlations.

| Construct | CR | AVE | PSC | HPB | HIL | SCA |
| --- | --- | --- | --- | --- | --- | --- |
| PSC | 0.950 | 0.747 | **0.864** |  |  |  |
| HPB | 0.921 | 0.700 | 0.673 | **0.836** |  |  |
| HIL | 0.951 | 0.762 | 0.871 | 0.712 | **0.873** |  |
| SCA | 0.948 | 0.752 | 0.818 | 0.708 | 0.854 | **0.867** |

Table S3. Discriminant validity: Fornell–Larcker criterion.

| Construct | PSC | HPB | HIL | SCA |
| --- | --- | --- | --- | --- |
| PSC | 1 |  |  |  |
| HPB | **0.681** | 1 |  |  |
| HIL | **0.870** | **0.709** | 1 |  |
| SCA | **0.817** | **0.707** | **0.847** | 1 |

Table S4. Discriminant validity: Heterotrait–monotrait (HTMT) ratios.

| Node | Community | Strength | Closeness | Betweenness | Predictability | Bridge Strength |
| --- | --- | --- | --- | --- | --- | --- |
| PSC1 | PSC | 0.7884 | 0.0031 | 6 | 0.6719 | 0.2529 |
| PSC2 | PSC | 1.0461 | 0.0038 | 56 | 0.7121 | 0.3254 |
| PSC3 | PSC | 0.7690 | 0.0031 | 2 | 0.7056 | 0.2441 |
| PSC4 | PSC | 0.9834 | 0.0036 | 32 | 0.7337 | 0.2808 |
| PSC5 | PSC | 1.3351 | 0.0034 | 36 | 0.8147 | 0.2333 |
| PSC6 | PSC | 0.9386 | 0.0033 | 10 | 0.7716 | 0.2046 |
| HPB1 | HPB | 0.8485 | 0.0025 | 4 | 0.6736 | 0.0568 |
| HPB2 | HPB | 0.7185 | 0.0026 | 0 | 0.6842 | 0.2787 |
| HPB3 | HPB | 0.9219 | 0.0025 | 14 | 0.6610 | 0.0430 |
| HPB4 | HPB | 0.8127 | 0.0030 | 74 | 0.6794 | 0.2328 |
| HPB5 | HPB | 0.7021 | 0.0031 | 60 | 0.6125 | 0.1975 |
| HIL1 | HIL | 0.9214 | 0.0034 | 58 | 0.7351 | 0.1523 |
| HIL2 | HIL | 0.9807 | 0.0031 | 32 | 0.7788 | 0.2345 |
| HIL3 | HIL | 0.9459 | 0.0033 | 24 | 0.7741 | 0.3290 |
| HIL4 | HIL | 0.7337 | 0.0029 | 2 | 0.7861 | 0.4804 |
| HIL5 | HIL | 0.9403 | 0.0036 | 86 | 0.7338 | 0.3154 |
| HIL6 | HIL | 0.7214 | 0.0033 | 4 | 0.7179 | 0.2499 |
| SCA1 | SCA | 1.1232 | 0.0037 | 18 | 0.8018 | 0.5724 |
| SCA2 | SCA | 0.7803 | 0.0034 | 10 | 0.7189 | 0.2766 |
| SCA3 | SCA | 1.2734 | 0.0042 | 130 | 0.7648 | 0.3830 |
| SCA4 | SCA | 0.9069 | 0.0035 | 18 | 0.7514 | 0.3017 |
| SCA5 | SCA | 1.0758 | 0.0037 | 36 | 0.7718 | 0.0490 |
| SCA6 | SCA | 0.8865 | 0.0034 | 8 | 0.7009 | 0.1819 |

Table S5. Comprehensive node centrality indices: bridge strength, bridge

| Analysis Condition | CS-Coefficient | Top 3 Bridge Nodes (Rank Order) | Network Density | Number of Edges |
| --- | --- | --- | --- | --- |
| Main analysis (γ = 0.50, Spearman) | 0.75 | SCA1 (1), HIL4 (2), SCA3 (3) | 0.249 | 63 |
| γ = 0.25, Spearman | 0.71 | SCA1 (1), HIL4 (2), SCA3 (3) | 0.312 | 79 |
| γ = 0.75, Spearman | 0.68 | SCA1 (1), HIL4 (2), HIL3 (3) | 0.187 | 47 |
| γ = 0.50, Pearson | 0.73 | SCA1 (1), HIL4 (2), SCA3 (3) | 0.253 | 64 |
| γ = 0.25, Pearson | 0.69 | SCA1 (1), HIL4 (2), SCA3 (3) | 0.318 | 81 |
| γ = 0.75, Pearson | 0.66 | SCA1 (1), HIL4 (3), PSC5 (2) | 0.191 | 48 |

Table S6. Sensitivity analysis results across EBICglasso tuning parameters γ = 0.25, 0.50, and 0.75.
